# Supplementary material for: Identification of Male-Specific Molecular Markers by Recombination of RhoGEF10 Gene in Spotted Knifejaw (Oplegnathus punctatus)
Source: MDPI journal article supplement (doi:10.3390/genes13071262), 2022-07-15
Supplement: s1 [file s1]

## **Chromosome X1:** CDS sequence of RhoGEF10 gene

ATGTCTACTGTGATGTCTCAGCAACCGCCAAAGGAGGATGAGGAGGAGGAAGATGAGGAG  
CAAGGGGAAGAGTTTTTTGTTTGAGGACAGCACAGATGAGGAGAACTTCAGGAGGACAGT  
AAAGGGATCGGCTCTGACTCTGTAAATCTGTCCAGTTGTCAAAAAAGGAGGACAGCAAG  
ACATCAGACAGCGTATCACAAACAGGCACAGACAGCACACCACTTCCCAAACTTCGCCT  
CCTGCTGGACAGGAGGGCGTTCCCACCAAGGAAGGAGCTTCAATTTCTGCTGCAGACTGT  
GCTAACATTTGGGTACCTTCCAGGGCTCAGCAGCAGCAGCCGAGCCCCGTACCTCAGCT  
CCTTGTGTGGGAGAGGAGCTCCGGGGCTTCCCGTGGTGCCGTCAGCTGTTGAGACGCTG  
GCTGATTCAGGAGACCACAGCAAAGAAATCGTCAAGGAAAGCTCCGGCTCAAGGGACATC  
TCTGAAGCTTTACATGTGGCTGAAGCTGAGCCACAGGCGGTGGAGGCTTCAGAGGTGATC  
TATGATGATGTTCCAAGTGAGGACCCCCCTCTCTCCCGATGAAGATATGATCTATGAAGAT  
GTTTCAGAGAGACAGTGGTCTCTGGATGCGGACAACGGGTGGAGCTCCAGTGAGTTTGAA  
AGCTACGACGAGCAGTCTGATAACGAGACCAAACCTCCCAACACGGAGCAAGCTCTCTCCT  
GAAGTGCGTCGGCTGAGGGAACGGTGTGCCAAGACCAAACGTGAACTGGCCATGAGGCTG  
TCTGGCAAGCACAACCTATGACATCAAGGTTCAACAGCTCATGAAGGCGGCGAGAAGCGGA  
ACAAAGGATGGACTTGAAAAGACCAAAATAGCCGTCATGCGAAAAGTTCCCTTCCTGCAG  
AGAAAAGAGCAATTGGAGGAGGAAGATGATGCAGGGTACCTGGATGTGGCTGTGTCAGAA  
GACAAGCATCCTCCCCACAGCTGAGCCCCATGCCAGAGGGGCTGACCAGCCACCAGGTT  
GTCAGACGCCATATCCTCGGCTCCATCATTAGAGCGAGCGGAGCTACCTGGAGTCTCTC  
AGGAGAATCTTGCAGGAATACCACAGACCATTGATGGAAGCTGATCCACGCATCCTGAGT  
CCAAGGAAGATCCGGCCTATATTTTACCGAATCAGGGAGATCACACAGTGCCACTCCATG  
TTTCAGATTGCACTGGCGTCACGTGTGGCTGAATGGGACAGCAGTGAGAAAATTGGAGAC  
TTATTTGTTGCCTCGTTTCCAAGTCCATGGTGCTGGATGTATACAGTGATTACGTGAAC  
AACTTCACCAATGCCATGGCTCTCATTAAAAAGGCGTGATGTCCAAACCAGCTTTTCTG  
GAATTCTTAAAGAAGAAACAGGCATCTAGTGTTGACCGGATCACTCTTTATGGCCTGATG  
GTAAAGCCCATTCAACGATTCCCTCAATTCAATTTGCTTCTGCAGGACATGCTTAAGAAT  
ACACCAAAGGGCCACGTGGATCGTCTGCCCCTGCAGCTAGCTCTGACAGAGCTGGAGATG  
CTGGCTGAGAAGCTGAATGAACAGAAACGAGTTGCTGACCAGATTGCAGAGACTCAACAA  
CTAGCCCGCAGCGTCAGTGATCGCCTGCTCAGTAAGCAACTGAACTCGGAGCAGGGGTCA  
CTGGTCCTTTGTGAGACGCTTATTGAGACTGTGTATGGCGAGCGGGGACAAGTCCTGAAG

TCGAAGGAGAGAAAGGTCTTCCTCTTTGATGATGTACTCATCTGTGCCAACATAAATGTC  
AAGGGGCCCTCCAGATATCAGCAGCCTGGTCCCTGTCGGCCCCAAGTACACCATGAAGTGG  
AGCGCCCCCTTACAGCAGGTGCAAGTAGTAGAGGTGGGGCAGGAGGGCTCTCAAAGCAAA  
GACACCTTCTTCCCGCAGAGCGGGGCCAAGCGGCCAAGTGGTGCCTGCACTTCAGGTAAA  
GCGATCCTTGGCCCTCCACGGCTCTACCAGGAGCTGCAGGAACTGCAGCATGACCTCTCT  
GTCGTGGAGGAGGTCACTCTCCTTGTGGGCACGCTGCAGGGGATGTACCAGAACCTGAAC  
ACCACTGTGGCCCAGGACTGGTGTCTGGCTCTGCAGAGGCTTATTGCGATCAAAGAAGAA  
CAGATCCAGAGTGCTAACAAATGTCGCTTACGCCTGCAGGTGCCTGGCAGGCCAGACAAG  
TCAGGGCGTCCTGTCAGTTTCATGGTGGTCTCAACACTCCCAACCCCCCTTAGCAAGATC  
TCCTGGGTCAACCGTCTGCACTTGGCCAAGATTGCACTACGAGAGGAGAATTCACCAGGC  
TGGTTATGTGGAGAGGACGAAGGGAAGACGATGGCCCCGTTTGGTGTCCGCTGCTTGCC  
TGTCACATGCCTGTCTTTGCTACGAAGTCACCCGAGAGAAAGCTTGAAGCTGCCCTCCAC  
AATCCTGTTCACTGTGCATTGTTGGGCTTCTCTGCAGCAAGCACCTCCTTACCTCAGGGC  
TACCTCTGGGTGGCTGGCGGAGGAGAAGGTTCTCAGTGGCAGATAGAGATATTTCCCTC  
AACAGGCCCCATGCCAAGGGCTGTAAAGAGCCTGCAGGTGGGCTCTGCAGTCCGATGTCTG  
GAATATGTGCCAGAACCTTCTCCGACTGAGGAAGCGGAGGCTGGAGTTCACAAGGCCCCC  
TCAGAGATCGGTGCCAACATTTGTGTTGGACTAGACGATGGGCGCATACTGGTCTACGGC  
AGTGTGGACACTGCAGCACAAATGCCTATTGACCCTCCATAACCCAGAGGGCTGCCCTGTG  
CTGTGCCTGAAGCACTCCTCCCGCTTCCTGTTTGCAGGCCTACGGAACGGGACCATGATG  
GTTTATGGAAGAAGTAACAGTGATGACCTTTGGGACCCTGACTCCTGCAGATGTGTAAGC  
CTGGGCTCAGAACCAGTGCGGACACTGTTGGTGTTCGATGACTCAGTGTGGGCAAGCTGC  
GGGAACTCGGTCACAGTCATGGACATCTCCAGCCTCACCACTCAGAAGTTTGAAGTTCAT  
CCAGACCCGATGGTCAGCGTTGCACACATGGCATGTGCCGGTGGAGGGGTGTGGATGGCA  
TTCTCCGAGGGTTCCTCCATTTCGTCTCTTTCATACTGAAACACTGGAGCTTCTGCAGGAA  
ATCAACATCTCAACACGCTCAACGCTGCTGAACACTGGTCAAAAGAGCATGCGAGTCACG  
AGTCTCCTAATTTGCCAGGGGCTGTTATGGGTGGGCACTGCCCAAGGCTTAATTATCACT  
CTTCAGTTCCCAAACCTGGAGGGCATCCCCAAAATAACAGGAAAGGGAATGATCTCTCTA  
AATGCCCATTTGTGGGCCTGTGGACTTCCTGGTAGCCACCACCAGCACTCTGTCTCCTGAA  
ATGCTGAAGAGGGATTCTGTCGGGGATGGCCCAGACTCTGCCTGTGGAGGCGAGGACCGC  
AGCGACACCTCCTCTCAGGAATCCCTGCAACAGTCCAGCTCCTACCAGGGAGAGGGGAGA

GGCAAAGGACGCGGCGTTCTGCTGCAGTACAAGCTGCGCTCCACGTCAGGACTACCTGGA  
CGGCCATTGACGGCACTGGGCGACGAGGCATCGGACTCCTCCCTGGAGTCTTTGGAGCAC  
AGCGTGGAAGATGGATCTATCTATGAGCTCAGTGATGACCCAGAAATGTGGGTTCTGGGGA  
CGTCCTTGTGAGAGAGACGGGGGACGCAGGGACAGGGTGATCTCGGCAGCGGTTATCTCT  
GGAGGCAAGGGCTTCCGTAGGCTGAAGGAAGGAGCAGCAGCAGGTACAAGGACAAGTGGG  
GAGGGTTCAGAGAATATTCTTATGGTGTGGCAGCTCCCACTGACGGTGTGA

**Chromosome Y:** CDS sequence of RhoGEF10 gene

GCCACTTCAAATGGTTCTCAATATTCTCATGAACAATTCCTGAACAATAGG  
ATATAATAAACAGTATATGATATGATATATAATACTTTATGTAGCATAATGTATG  
TGTTGAATGAATGAATGAACACTGGTACTCTTCTCTTTTATGCCTCCTAAGT  
CTTATCATATTGTGCTGTGTGTTCAAGTTTTACGTGTGTATAATGTATAATGC  
ATCTCCAGACAGTTCCTGATTAAATAAAGGTTCAACCAAAAATAAAAACTC  
TAATGCTGCTAATGCTGATTTTCTCACATGCTGATAACAA
