# Supplementary material for: Identification of Male-Specific Molecular Markers by Recombination of RhoGEF10 Gene in Spotted Knifejaw (Oplegnathus punctatus)
Source: MDPI journal article supplement (doi:10.3390/genes13071262), 2022-07-15
Supplement: s1 [file s1]

**Base sequence of female *Oplegnathus punctatus* (326 bp)**

1 CAACTACCAC TCTGAATGCT GCTTAATTTA TTGTTGGAGG CCAGTGTTAA GAGATTTAAG  
61 GACTGGTTCT CTTTACCTTC TGCTCTCTTA AGTAGGTGCA AATGTGAACT TTTATGTGAT  
121 TTAGAAGGTG TTTTCACACA ATTTAATTGC TGTATGTTGA AACTAATGAG TTGACTTGAT  
181 ATTTGTTCTT TCAGTTCTGT CATGAAAAGT CAACTCTTGG GTTGATCCGT ACAAGACGGA  
241 TAAATCAAGG CTCGAAAATA AAACATTTGT TTAAAATAT GAAAATACAA GCTTGAAACA  
301 ATGGGCCTAA AGTGTGGTGG TTGAAC

**Base sequence of male *Oplegnathus punctatus* (879 bp)**

1 CAACTACCAC TCTGAATGCT GCTTAATTTA TTGTTGTAGG CCAATGTAA GAGATTTAGG  
61 GTGCTTTCAC ACCTGAGCTG TTTGGTCCGT TTTAATTGAA CCCTGGTGCA TTCGTTGGAT  
121 AGTCCGTTTT GTTTGGGGTG GTGTGAAAGC TCATTCGAAA TCCAAACAAC TTTCAAATCC  
181 ATAGCTTATT ATGATCAAAT CTCGCCCGTC TTCTGTCTAA CAACGACAAC ACATCATAAT  
241 CCCTCTCTCT CATCAGGGCC TGCCTTCTCC TTCTCACTTG CTGTCTTGTC AGCTGCTCAT  
301 ATTGTTTGCC TTCTTGTAAG GCATTTAATT GATGGAAACA CCAAAGCAAA ACCACAAAAA  
361 CTCAAGACCA CATAAATTTG GTGTTGTTCC ATTATTCCTG AGATCAGGAA GTGTCGGCGA  
421 GTTTCACCTG GATATTTTGT CCAATTGACG AGCAACCGTT TTGACCGCGT GACATTTGTT  
481 TACAATATTT GGTCTGCTTG ACAAAGTTAC AGTGTGAAAG CGAACC GAAC CAAATGAAAA  
541 ATGCAACAAT GTTGCAACTT CACCCCGAAT CGCTCCGAGA CCACCGAACT ACAGATGTGA  
601 AAGCGCCCTT AAGGGCAGGT TCTCTTTACC TTCTGCTCTC TTAAGTATGT GCAAATGTGA  
661 ACTTTTATGT GATTTAGAAG GTGTTTTCAC ACAATTTAAT TGCTGAATGT TGAAACTAAT  
721 GAGTTGACTT GATCTTTGCT TTTTCAGTTC TGTCATGAAA TGTCAACTCT TGGGTTGATC  
781 CGTACAAGAC GGTTAAATCA CGGCTCAAAA ATAAAACATT CGTTTTAAAA TATGAAAATA  
841 CAAGCTTGAA ACAATGGGCC TAAAGTGTGG TGGTTGAAC
